# Supplementary material
Source: publisher figshare collection journal article supplement (https://sage.figshare.com/ndownloader/files/12801347)
Supplement: Supplementary file 1 [file 12801347]

**Economic Analysis and Life Cycle Impact Assessment of Municipal Solid  
Waste (MSW) Disposal: A Case Study of Mumbai, India  
Supplementary information**

Yash D. Mehta\*, Babu Joseph\*<sup>†</sup>, Yogendra Shastri\*

\*Department of Chemical Engineering, Indian Institute of Technology Bombay, Mumbai, India 400076

<sup>†</sup>Department of Chemical and Biomedical Engineering, University of South Florida, Tampa, FL 33647

**S1. Municipal solid waste generation data**

**Table S1. Annual waste acceptance rates at dumpsite/landfill**

| Year         | MSW dumped (tonnes) |
|--------------|---------------------|
| 2016         | 1505187             |
| 2017         | 1513211             |
| 2018         | 1521278             |
| 2019         | 1529387             |
| 2020         | 1537540             |
| 2021         | 1545736             |
| 2022         | 1553976             |
| 2023         | 1562260             |
| 2024         | 1570588             |
| 2025         | 1578961             |
| 2026         | 1587378             |
| 2027         | 1595840             |
| 2028         | 1604347             |
| 2029         | 1612899             |
| 2030         | 1621497             |
| 2031         | 1630141             |
| 2032         | 1638831             |
| 2033         | 1647567             |
| 2034         | 1656350             |
| 2035         | 1665180             |
| <b>Total</b> | <b>31678156</b>     |

## S2. Economic analysis of landfilling

This section explains the methodology used for performing the detailed economic analysis of the landfilling operation.

The variable cost estimation, such as the cost of fuel for transportation and the cost of electricity are based on the consumption rates and the prevailing prices in Mumbai. The capital cost estimation, in contrast, is challenging. The capital cost values are generally available in literature only at fixed throughput/capacity values. These values need to be scaled based on the actual capacity of the plant/process being set-up. This is done by using the well known engineering approach of cost scaling, which is given as per the following equation:

$$C_2 = C_1 \left( \frac{V_2}{V_1} \right)^\varphi$$

where,  $C_1$  is the cost of the equipment for a throughput/capacity of  $V_1$  as reported in literature.  $V_2$  is the new throughput/capacity for which the cost  $C_2$  needs to be determined.  $\varphi$  is known as the scaling coefficient, which is typically between 0.6-0.8. This approach is used for scaling the cost of all the equipment (Peters et al., 2003).

Further, if the original value reported in literature is for a different year, the cost further needs to be adjusted for the year of analysis to account for the time value of money. The Chemical Engineering Plant Cost Index (CEPCI) is commonly used for this purpose and is also used in this work. Once the total equipment capital cost is known, Peters et al. (2003) propose coefficients to calculate the other cost components, such as the maintenance cost, as a function of the total equipment capital cost. This approach is adapted here for the economic calculations.

### S2.1. Transportation of waste

Transportation cost does not include the cost incurred in door-to-door collection of waste. Instead, only the cost associated with transport of waste to the landfill/dumpsite from different localities is considered. Capacity of truck ( $10 \text{ m}^3$ ) used for transporting waste is the weighted average of capacities of different types of vehicles used currently in Mumbai for collecting and transporting waste, as reported in Table S2 (Municipal Corporation of Greater Mumbai, 2017). Fixed capital investment is required for purchasing trucks at the start of the year and after 10 years, when the old trucks are to be replaced with new trucks. No extra truck is purchased in order to replace vehicles under maintenance. Operating and maintenance expenses constitute expenses on diesel, salaries and maintenance of trucks and are calculated annually. Annual maintenance cost of a truck is assumed to be 6% of CAPEX (Ministry of Urban Development, 2017). Number of workers per truck (one driver and one helper) always remains the same. Salary of a driver (INR15,000/month) is more than that of a helper (INR10,000/month). Each truck conducts one trip per day. A trip is a one-time journey of a truck from vehicle parking site to waste collection points to landfill site and back to the

parking site. The average distance travelled by a truck per trip is 40 km (Pahade and Nagarabett, 1997). The calculations are reported in Table S3.

**Table S2. Vehicles employed for MSW transportation by MCGM**

| Type of vehicle      | Avg. vehicle capacity (m <sup>3</sup> ) | No. of vehicles | Total capacity (m <sup>3</sup> ) |
|----------------------|-----------------------------------------|-----------------|----------------------------------|
| Open trucks          | 7.5                                     | 47              | 353                              |
| Compactors           | 15                                      | 296             | 4440                             |
| Skip Vehicles        | 3.75                                    | 123             | 461                              |
| Dumpers              | 7.5                                     | 279             | 2093                             |
| Bulk refuse carriers | 22                                      | 18              | 396                              |
| <b>Total</b>         |                                         | <b>763</b>      | <b>7742</b>                      |

Therefore, weighted average of vehicle capacities =  $7742/763 \sim 10 \text{ m}^3$

**Table S3. Cost of transportation of MSW to dumpsite/landfill**

| Item                                 | Value     | Unit             |
|--------------------------------------|-----------|------------------|
| Quantity of waste landfilled         | 4124      | tonnes/day       |
| Number of trips                      | 1         | trip/truck/day   |
| Capacity of truck                    | 10        | m <sup>3</sup>   |
|                                      | 8.5       | Tonnes           |
| Number of trucks required            | 485       |                  |
| Purchasing cost of 1 truck           | 0.2       | INR crores       |
| Total purchasing cost of trucks      | 97        | INR crores       |
| Replacement period of trucks         | 10        | Years            |
| Total cost of purchasing trucks      | 194       | INR crores       |
| Waste dumped in 1 <sup>st</sup> year | 1.51      | mn tonnes        |
| <b>Transportation cost (capital)</b> | <b>64</b> | <b>INR/tonne</b> |
|                                      |           |                  |
| Number of drivers                    | 485       |                  |

|                                    |            |                  |
|------------------------------------|------------|------------------|
| Number of helpers                  | 485        |                  |
| Salary of 1 driver                 | 15,000     | INR/month        |
| Salary of 1 helper                 | 10,000     | INR/month        |
| Annual expense on salaries         | 14.6       | INR crores       |
| Avg. distance travelled by 1 truck | 40         | km/day           |
| Truck mileage                      | 3          | km/litre of fuel |
| Diesel price                       | 58.1       | INR/litre        |
| Annual expense on fuel             | 13.7       | INR crores       |
| Annual maintenance cost            | 5.8        | INR crores       |
| Total annual O&M expenses          | 34.1       | INR crores       |
| <b>Transportation cost (opex)</b>  | <b>227</b> | <b>INR/tonne</b> |
| <b>Total cost (capex + opex)</b>   | <b>291</b> | <b>INR/tonne</b> |

## S2.2. Land acquisition

The landfill is assumed to be 20 metres high and the bulk density of waste to be landfilled is 0.85 tonne/m<sup>3</sup> (Ministry of Urban Development). Daily dirt cover requires 10% of the volume occupied by waste while liner and final cover occupy 12.5% of additional space. Moreover, 10% of the volume would be reduced and likely be available due to settlement or biodegradation over the period of time. 15% additional land would be required for infrastructural facilities such as roads, buildings, utilities, and weighing system. Land acquisition cost (INR7.8 million/hectare) is as decided by City and Industrial Development Corporation of Maharashtra Ltd. (2014). Land requirement for landfilling would be more than open dumping due to the space occupied by liner and cover system. The cost of land acquisition is reported in Table S4.

**Table S4. Cost of land acquisition for dumpsite/landfill**

| Item                                                              | Value | Unit              |
|-------------------------------------------------------------------|-------|-------------------|
| Total amount of waste dumped                                      | 31.7  | mn tonnes         |
| Volume of waste dumped<br>(= Capacity of open dumpsite)           | 37.3  | mn m <sup>3</sup> |
| Extra volume for daily dirt cover                                 | 10    | %                 |
| Extra volume for liner and cover                                  | 12.5  | %                 |
| Volume likely to be available due to settlement or biodegradation | 10    | %                 |
| Extra volume required                                             | 12.5  | %                 |

|                                    |            |                   |
|------------------------------------|------------|-------------------|
| Total landfill capacity            | 41.9       | mn m <sup>3</sup> |
| Height of landfill                 | 20         | m                 |
| Waste disposal area required (OD)  | 186        | ha                |
| Waste disposal area required (SL)  | 210        | ha                |
| Addl. area for infrastructure      | 15         | %                 |
| <b>Total land requirement (OD)</b> | <b>214</b> | <b>ha</b>         |
| <b>Total land requirement (SL)</b> | <b>241</b> | <b>ha</b>         |
| Total land acquisition cost (OD)   | 167        | INR crores        |
|                                    | <b>53</b>  | <b>INR/tonne</b>  |
| Total land acquisition cost (SL)   | 188        | INR crores        |
|                                    | <b>59</b>  | <b>INR/tonne</b>  |

### S2.3. Landfilling: Construction and operations

Landfilling constitutes five components: site development, construction, facility operations and maintenance, facility closure and facility post-closure costs. In this work, these costs are estimated based on economic analysis of an 88 tonnes/day landfill in rural Oklahoma (USA), occupying 22.5 acres of land and constructed in three phases of 6-7 years each (Eilrich et al., 2003). Costs for site selection and characterisation, landfill design & detailed engineering, mobilisation-demobilisation and consultancy are not considered. The costs are recalculated for year 2016 by adjusting for inflation. Some of the cost components are scaled up linearly for Mumbai landfill according to the landfill area. The rule of six-tenths is also used, wherever applicable, to determine costs for the bigger landfill with 4124 tonnes/day capacity (Whitesides, 2012). The detailed calculations are reported in Tables S5-S9.

**Table S5. Cost for site development at landfill**

| Item                        | Value   | Unit              |
|-----------------------------|---------|-------------------|
| Fuel storage tank with pump | 2448    | US\$ (1996)       |
| Compactor                   | 245084  |                   |
| Dozer                       | 363164  |                   |
| Front end loader            | 153997  |                   |
| Grader                      | 203100  |                   |
| Total                       | 967793  |                   |
|                             | 1265742 | US\$ (2016)       |
|                             | 8.43    | INR crores (2016) |

|                                            |       |                   |
|--------------------------------------------|-------|-------------------|
| Linear scaling by area for Deonar landfill | 29.11 | INR crores (2016) |
|--------------------------------------------|-------|-------------------|

**Table S6. Landfill construction cost for all phases**

| Item                                       | Value   | Unit              |
|--------------------------------------------|---------|-------------------|
| Structures and equipment                   | 19694   | US\$ (1996)       |
| Access roads                               | 38306   |                   |
| Office, furniture                          | 58488   |                   |
| Maintenance/storage buildings              | 38400   |                   |
| Truck scale and weight system              | 23206   |                   |
| Scale house                                | 4320    |                   |
| Fencing (8 feet, chain link)               | 50903   |                   |
| Monitoring systems                         | 20762   |                   |
| Landscaping (berms)                        | 33918   |                   |
| Total                                      | 287997  |                   |
|                                            | 375659  | US\$ (2016)       |
|                                            | 2.50    | INR crores (2016) |
|                                            |         |                   |
| Site preparation                           | 917619  | US\$ (1996)       |
| Site utilities                             | 14788   |                   |
| Total                                      | 932407  |                   |
|                                            | 1216218 | US\$ (2016)       |
|                                            | 8.1     | INR crores (2016) |
| Linear scaling by area for Deonar landfill | 186.49  | INR crores (2016) |
| Overall cost                               | 188.99  | INR cr            |

**Table S7. Annual landfill site O&M cost**

| Item                                       | Value   | Unit              |
|--------------------------------------------|---------|-------------------|
| Bulldozer (1590 hours)                     | 80422   | US\$ (1996)       |
| Compactor (1590 hours)                     | 76574   |                   |
| FEL (1590 hours)                           | 73728   |                   |
| Grader (1590 hours)                        | 44981   |                   |
| Bulldozer (1590 hours)                     | 23206   |                   |
| Site repairs and maintenance               | 80693   |                   |
| Total                                      | 356399  |                   |
|                                            | 464882  | US\$ (2016)       |
|                                            | 3.1     | INR crores (2016) |
| Linear scaling by area for Deonar landfill | 10.7    | INR crores (2016) |
|                                            |         |                   |
| Gas sampling and analysis                  | 700     | US\$ (1996)       |
|                                            | 913     | US\$ (2016)       |
|                                            | 0.0061  | INR crores (2016) |
|                                            |         |                   |
| Final cap construction                     | 878108  | US\$ (1996)       |
|                                            | 1145392 | US\$ (2016)       |
|                                            | 7.63    | INR crores (2016) |
| Linear scaling by area of one phase        | 8.78    | INR crores (2016) |
| Overall cost                               | 19.5    | INR crores (2016) |



**Table S8. Landfill facility closure cost**

| Item                            | Value  | Unit              |
|---------------------------------|--------|-------------------|
| Environmental monitoring        | 97294  | US\$ (1996)       |
| Drainage/erosion control system | 13656  |                   |
| Top soil sampling and analysis  | 1441   |                   |
| Gas sampling and analysis       | 175    |                   |
| Total                           | 112566 |                   |
|                                 | 146830 | US\$ (2016)       |
|                                 | 0.98   | INR crores (2016) |

**Table S9. Landfill facility post-closure cost**

| Item                                       | Value  | Unit              |
|--------------------------------------------|--------|-------------------|
| Maintain drainage/erosion control system   | 132935 | US\$ (1996)       |
| Maintain gas control                       | 71393  |                   |
| Top soil sampling and analysis             | 10806  |                   |
| Gas sampling and analysis                  | 10500  |                   |
| Total                                      | 225634 |                   |
| Scaling according to post-closure period   | 188028 |                   |
|                                            | 245261 | US\$ (2016)       |
|                                            | 1.63   | INR crores (2016) |
|                                            |        |                   |
| Maintain final cap                         | 698022 | US\$ (1996)       |
| Scaling according to post-closure period   | 581685 | US\$ (1996)       |
|                                            | 758742 | US\$ (2016)       |
|                                            | 5.05   | INR crores (2016) |
| Linear scaling by area for Deonar landfill | 116.3  | INR crores (2016) |
| Overall                                    | 118    | INR crores (2016) |

**S2.4. Leachate management (collection and treatment)**

Leachate contains organic matter, ammonia-nitrogen, heavy metals and chlorinated organic and inorganic salts (Renou et al., 2008). This leachate, when untreated, can contaminate the ground and

surface waters in which it gets released. Thus, leachate management becomes an important concern and landfilling technique, using waterproof covers, liner materials such as clay, geotextiles and/or plastics, becomes essential to control the amount of water entering the waste and thus, to minimise pollution (Lema et al., 1988). Leachate system construction costs, which majorly constitute liner costs, are calculated based on a similar landfill in rural Oklahoma, USA (Eilrich et al., 2003). These costs are scaled up linearly for Mumbai landfill according to the landfill area and also adjusted for inflation. The initial capital investment for the leachate treatment plant as well as operation and maintenance costs are determined based on a World Bank Guidance Note (Johannessen, 1999) for a 100 m<sup>3</sup>/day plant. The treatment method is biological treatment with air stripping. It is assumed that leachate would be treated at landfill site and hence, not transported. Although leachate would be generated primarily in the months of June-September during monsoon season in Mumbai, it is assumed to be stored and equal volume be treated daily so that capacity and hence, initial capital investment required for the plant, is reduced. The cost of storing leachate is not considered. Calculations are reported in Tables S10-S11.

**Table S10. Leachate system construction cost**

| Item                                       | Value   | Unit              |
|--------------------------------------------|---------|-------------------|
| Cell and leachate system liner             | 1875904 | US\$ (1996)       |
| Leachate management system                 | 284086  |                   |
| Total                                      | 2159990 |                   |
|                                            | 2817460 | US\$ (2016)       |
|                                            | 18.8    | INR crores (2016) |
| Linear scaling by area for Deonar landfill | 432     | INR crores (2016) |
|                                            |         |                   |
| Surface water controls                     | 22112   | US\$ (1996)       |
|                                            | 32559   | US\$ (2016)       |
|                                            | 0.22    | INR crores (2016) |
| Overall                                    | 432.2   | INR crores (2016) |

**Table S11. Cost for leachate collection and treatment**

| Item                                           | Value      | Unit                       |
|------------------------------------------------|------------|----------------------------|
| <b>Leachate system construction cost</b>       | <b>136</b> | <b>INR/tonne</b>           |
| US plant (100 m <sup>3</sup> /d) initial cost  | 3.60       | mn US\$ (1996)             |
|                                                | 5.51       | mn US\$ (2016)             |
|                                                | 36.7       | INR crores (2016)          |
| New plant (845 m <sup>3</sup> /d) initial cost | 132        | INR crores (2016)          |
| <b>Plant initial investment cost</b>           | <b>42</b>  | <b>INR/tonne</b>           |
|                                                |            |                            |
| Treatment cost                                 | 10         | US\$/m <sup>3</sup> (1996) |
|                                                | 15.34      | US\$/m <sup>3</sup> (2016) |
|                                                | 1022       | INR/m <sup>3</sup> (2016)  |
| <b>Treatment expenses</b>                      | <b>448</b> | <b>INR/tonne</b>           |
| <b>Total cost (capex + opex)</b>               | <b>626</b> | <b>INR/tonne</b>           |

### S2.5. Landfill gas flaring system

CH<sub>4</sub> and CO<sub>2</sub> are the major constituents of the landfill gas (LFG), with their concentrations varying between 40% and 60%. The concentration of non-methane organic compounds (NMOCs) is less than 1%. In order to reduce these GHG emissions from dumpsites/landfills, it is assumed that the gas is collected and flared in an enclosed system. The economic analysis of such a flaring system is based on a pre-feasibility report of LFG recovery and flaring system at Deonar dumpsite (Mumbai), where gas was collected from a total area of 40 hectares and the maximum LFG flow rate was 3900 m<sup>3</sup>/hr (US EPA, 2007). It is assumed that the LFG recovery and flaring system becomes operational from the 2<sup>nd</sup> year of the landfill's active period and continues till the end of the post-closure care period i.e. for a total of 44 years from 2017 to 2060. Cost components are a function of either landfill area, maximum LFG flow rate or both and are scaled up accordingly after adjusting for inflation. Average annual operating and maintenance costs are 7% of the capital expenditure. Costs for mobilisation and project management, security fencing, registration, validation and legal fees are excluded. Calculations are reported in Table S12.

**Table S12. LFG collection and flaring system costs**

|                                         |     | Reference system |          |             | New system |
|-----------------------------------------|-----|------------------|----------|-------------|------------|
|                                         |     | US\$ '07         | US\$ '16 | INR cr. '16 | INR crores |
| Vertical extraction wells and wellheads | a   | 601,000          | 698,135  | 4.65        | 24.4       |
| Main gas header collection pipe         | a,g | 748,000          | 868,893  | 5.79        | 70.0       |
| Lateral piping                          | a,g | 161,000          | 187,021  | 1.25        | 15.1       |
| Condensate management                   | a,g | 103,000          | 119,647  | 0.80        | 9.6        |
| Blower and flaring equipment            | g   | 375,000          | 435,608  | 2.90        | 6.7        |
| Total                                   |     |                  |          |             | 126        |
| <b>LFG system capex (INR/tonne)</b>     |     |                  |          |             | <b>40</b>  |
|                                         |     |                  |          |             |            |
| O&M expenses                            |     |                  |          |             | 8.81       |
| Total O&M expenses (44 years)           |     |                  |          |             | 388        |
| <b>Flaring O&amp;M cost (INR/tonne)</b> |     |                  |          |             | <b>122</b> |
| <b>Total cost (INR/tonne)</b>           |     |                  |          |             | <b>162</b> |

### S3. Economic analysis of composting

This section describes the economic calculations associated with composting and CO\_S scenario.

#### S3.1. Transportation of waste

All assumptions stated earlier for transporting waste to dumpsite/landfill are applicable in this scenario as well, except the average distance covered by a truck per trip. It is assumed that each of the five zones be a circular area whose radius would be equal to the one-way distance travelled by a truck from its parking site to the waste collection point and then to the composting facility. The total area of Greater Mumbai is 437.71 sq. km. Table S13 reports these calculations for year 2016.

**Table S13. Cost of transportation of MSW to composting site**

| Item                                    | Value      | Unit             |
|-----------------------------------------|------------|------------------|
| Quantity of waste composted             | 2121       | tonnes/day       |
| Number of trucks required               | 250        |                  |
| Total cost of purchasing trucks         | 100        | INR crores       |
| Waste composted in 1 <sup>st</sup> year | 0.77       | mn tonnes        |
| <b>Transportation cost (capital)</b>    | <b>64</b>  | <b>INR/tonne</b> |
|                                         |            |                  |
| Annual expense on salaries              | 7.5        | INR crores       |
| Area of each zone                       | 87.5       | sq. km.          |
| Avg. distance travelled by 1 truck      | 10.6       | km/day           |
| Annual expense on fuel                  | 1.9        | INR crores       |
| Annual maintenance cost                 | 3.0        | INR crores       |
| Total annual O&M expenses               | 12.3       | INR crores       |
| <b>Transportation cost (opex)</b>       | <b>159</b> | <b>INR/tonne</b> |
| <b>Total cost (capex + opex)</b>        | <b>223</b> | <b>INR/tonne</b> |

#### S3.2. Land acquisition and site development

A layout of the composting facility area includes tipping floor, area for shredding and trommeling, composting pad, curing pad, storage area for rejects and equipment, roads, buildings and buffer land (Diaz et al., 1993). Typical flow diagram of a high quality composting facility (HQCF) is shown in Fig. 1. Waste is piled on the composting pad in the form of windrows, which have a trapezoidal cross-section. Here, the dimensions of a windrow are assumed to be: length - 100 m, height - 1.8 m, base width - 4.2 m, top width - 0.6 m, and alley width between two windrows is assumed to be 1.0 m. The

dimensions of a curing pile, with triangular cross section, are: length - 100 m, height - 2.75 m, base-to-height ratio - 2 (US EPA, 2000). Retention time for producing high quality compost is eight weeks on the composting pad and four weeks on the curing pad (Komilis and Ham, 2004). Land area required for other facilities is assumed to be 15% of the area under the composting pad. Paving, grading and composting pad building costs are sourced from literature, whereas the office and storage building costs are assumed to be one-ninth of the compost pad building cost (Komilis and Ham, 2004). Tables S14-S16 report the calculations.

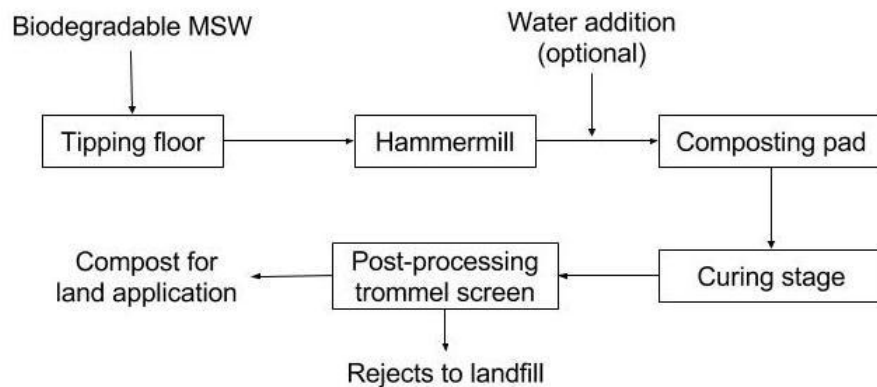

Figure S1: Flow diagram of a high quality composting facility. Water is added if moisture content in MSW is less than 50%. A pre-processing trommel screen precedes a hammermill if incoming waste is not segregated

**Table S14. Land requirement for composting pad per zone**

| <b>Item</b>                          | <b>Value</b> | <b>Unit</b>         |
|--------------------------------------|--------------|---------------------|
| Waste to be composted                | 424          | tonnes/day          |
| Density of waste                     | 850          | kg/m <sup>3</sup>   |
| Volume to be composted               | 499          | m <sup>3</sup> /day |
| Height of windrow                    | 1.8          | m                   |
| Base width of windrow                | 4.2          | m                   |
| Top width of windrow                 | 0.6          | m                   |
| Length of windrow                    | 100          | m                   |
| Volume of one windrow                | 432          | m <sup>3</sup>      |
| Composting pad retention time        | 56           | days                |
| Volume of waste generated in 56 days | 27951        | m <sup>3</sup>      |
| Number of windrows                   | 64.7 ~ 65    |                     |
| Total area for windrows              | 6.7          | acre                |
| Distance between two windrows        | 1.0          | m                   |
| Area for empty space (alley)         | 1.6          | acre                |
| Total land for composting pad        | 8.3          | acre                |
| Land for curing stage                | 0.84         | acre                |
| Extra land requirement               | 15           | %                   |
|                                      | 9.5          | acre                |
| Total land requirement per zone      | 10.4         | acre                |
|                                      | 4.2          | ha                  |

**Table S15. Land requirement for curing pad per zone**

| Item                               | Value   | Unit                |
|------------------------------------|---------|---------------------|
| Waste reduction post-composting    | 66.6    | %                   |
| Waste to be cured                  | 142     | tonnes/day          |
| Density of waste                   | 850     | kg/m <sup>3</sup>   |
| Volume to be cured                 | 166     | m <sup>3</sup> /day |
| Height of curing pile              | 2.75    | m                   |
| Base to height ratio               | 2       |                     |
| Base of curing pile                | 5.5     | m                   |
| Length of pile                     | 100     | m                   |
| Volume of one pile                 | 756     | m <sup>3</sup>      |
| Curing pad retention time          | 28      | days                |
| Volume of waste cured in 28 days   | 4662    | m <sup>3</sup>      |
| Number of windrows                 | 6.2 ~ 6 |                     |
| Total area for curing pad per zone | 0.84    | acre                |



**Table S16. Cost of land acquisition and site development of HQCF**

| Item                              | Value    |          |             | Unit                       |
|-----------------------------------|----------|----------|-------------|----------------------------|
|                                   | US\$ '98 | US\$ '16 | INR cr. '16 |                            |
| Cost of paving                    | 72,500   | 106,752  | 0.71        | per acre                   |
| Cost of grading                   | 5,000    | 7,362    | 0.05        | per acre                   |
| Cost of compost pad               | 283,280  | 416,827  | 2.78        | per acre                   |
| Cost of land acquisition          |          |          | 0.32        | per acre                   |
| Total cost for building pad       |          |          | 3.85        | per acre                   |
| Land for building pad (all zones) | 41       |          |             | Acres                      |
| Cost of building pad (all zones)  | 158      |          |             | INR crores                 |
|                                   |          |          |             |                            |
| Land for curing pad (all zones)   | 4.2      |          |             | Acres                      |
| Total cost of curing pad          | 1.3      |          |             | INR crores                 |
|                                   |          |          |             |                            |
| Extra land required (all zones)   | 6.2      |          |             | Acres                      |
| Extra land acquisition cost       | 1.9      |          |             | INR crores                 |
| Extra land development cost       | 0.3      |          |             | INR cr./acre               |
| Total extra land devpt. cost      | 1.9      |          |             | INR crores                 |
| Overall cost                      | 163      |          |             | INR crores                 |
|                                   | 100      |          |             | INR/tonne biodegrdable MSW |

### S3.3. Equipment acquisition

The major equipment required at a composting facility are windrow turner, trommel screens, tub grinder, hammermill, front end loader and an odour-control system. The number of units required for each of the five zones is calculated based on the waste input flow rate. The composting facility is assumed to be enclosed and fitted with fans which direct air to the odour-control system, operating continuously using the biofiltration technique. Height of the building is 4.57 m and the air inside it would be exchanged every two hours (US EPA, 2000). Table S17 shows the calculations.

**Table S17. Cost of equipment acquisition for composting**

| Equipment                           | No. of units |          | Unit cost |          |                | Total cost<br>(INR crores)          |
|-------------------------------------|--------------|----------|-----------|----------|----------------|-------------------------------------|
|                                     | Per tpd      | Per zone | US\$ '98  | US\$ '16 | INR cr.<br>'16 |                                     |
| Windrow turner                      | 0.173        | 1.75 ~ 2 | 180,000   | 265,038  | 1.76           | 3.53                                |
| Trommel screens                     | 0.0025       | 1.06 ~ 1 | 100,000   | 147,244  | 0.98           | 0.98                                |
| Tub grinder                         | 0.0038       | 1.61 ~ 2 | 180,000   | 265,038  | 1.77           | 3.53                                |
| Hammermill                          | 0.0029       | 1.23 ~ 1 | 250,000   | 368,109  | 2.45           | 2.45                                |
| Front end loader                    | 0.003        | 1.27 ~ 1 | 150,000   | 220,865  | 1.77           | 1.47                                |
| Total cost                          |              | 7        |           |          |                | 12.0                                |
| Cost for all zones                  |              | 35       |           |          |                | <b>60</b>                           |
|                                     |              |          |           |          |                |                                     |
| Odour control system                |              |          | 52        | 77       | 5128           | per ft <sup>3</sup> /min            |
| Odour control system flow rate      |              |          |           |          | 223017         | ft <sup>3</sup> /min                |
| Total cost for odour control system |              |          |           |          | <b>114</b>     | INR crores                          |
| <b>Overall cost</b>                 |              |          |           |          | <b>174</b>     | INR crores                          |
|                                     |              |          |           |          | <b>107</b>     | INR/tonne<br>biodegrad-<br>able MSW |

### **S3.4. Operations and maintenance**

Energy requirements, labour wages and overheads are considered for determining the operating cost. Windrow turner, tub grinder and front end loader run on diesel while hammermill, trommel screen and the odour-control system use electricity. Requirement of 0.1 employees per tonne per day at the facility is assumed, with an average monthly salary of INR12,000 per employee. Overheads comprised 40% of the labour expenses (Komilis and Ham, 2004). Annual maintenance costs are also associated with each equipment. Tables S18-S19 report the calculations (BEST, 2016).

**Table S18. Annual operating cost of composting**

| Item                                    | Value    | Unit                         |
|-----------------------------------------|----------|------------------------------|
| Labour requirement                      | 0.1      | person/tpd                   |
| Total people employed                   | 212      |                              |
| Total expense on salaries               | 3.05     | INR crores                   |
|                                         |          |                              |
| Expense on overheads                    | 40       | % of labour                  |
|                                         | 1.22     | INR crores                   |
| Fuel requirement                        |          |                              |
| Turner                                  | 0.13     | kWh/tonne                    |
|                                         | 100655   | kWh/year                     |
| Tub grinder                             | 10.2     | kWh/tonne                    |
|                                         | 7897536  | kWh/year                     |
| FEL                                     | 0.37     | kWh/tpd                      |
|                                         | 6875502  | kWh/year                     |
| Annual energy requirement from diesel   | 14873693 | kWh/year                     |
| Energy obtained on combustion of diesel | 11.1     | kWh/litre                    |
| Annual diesel requirement               | 1339972  | litre/year                   |
| Expense on diesel                       | 7.79     | INR crores                   |
|                                         |          |                              |
| Electricity requirement                 |          |                              |
| Hammermill                              | 15       | kWh/tonne                    |
|                                         | 11614023 | kWh/year                     |
| Post-processing trommel screen          | 0.8      | kWh/tonne                    |
|                                         | 619415   | kWh/year                     |
| Odour-control system                    | 0.00005  | kW/m <sup>3</sup> of air/day |
|                                         | 3983073  | kWh/year                     |
|                                         | 5.14     | kWh/tonne                    |
| Total electricity requirement           | 16216511 | kWh/year                     |
|                                         | 20.94    | kWh/tonne                    |
| Cost of unit electricity                | 7.5      | INR/kWh                      |
| Expense on electricity                  | 12.2     | INR crores/year              |
| Total annual O&M costs                  | 24.2     | INR crores/year              |
|                                         | 313      | INR/tonne biodegradable MSW  |

**Table S19. Annual equipment maintenance cost for composting**

| Item                            | Value    |          |         | Unit                           |
|---------------------------------|----------|----------|---------|--------------------------------|
|                                 | US\$ '98 | US\$ '16 | INR '16 |                                |
| Windrow turner<br>(8*365 hours) | 22       | 32       | 2131    | per hour per turner            |
|                                 |          |          | 5.44    | INR crores (all zones)         |
| Trommel screen                  | 500      | 736      | 49018   | per year per screen            |
|                                 |          |          | 0.026   | INR crores (all zones)         |
| Tub grinder                     | 0.741    | 1.09     | 73      | per tonne per year             |
|                                 |          |          | 0.015   | INR crores (all zones)         |
| Hammermill                      | 0.741    | 1.09     | 73      | per tonne per year             |
|                                 |          |          | 0.015   | INR crores (all zones)         |
| FEL                             | 1000     | 1472     | 98035   | per year per FEL               |
|                                 |          |          | 0.062   | INR crores (all zones)         |
| Odour control system            | 500      | 736      | 49018   | per year                       |
|                                 |          |          | 0.0049  | INR crores (all zones)         |
| Total                           |          |          | 5.6     | INR crores (all zones)         |
|                                 |          |          | 72      | INR/tonne<br>biodegradable MSW |

**S3.5. Landfilling of remaining MSW and rejects from composting**

MSW constituents, which are neither composted nor recycled, end up in a sanitary landfill along with rejects from the composting facility. As mentioned earlier, the cost components of landfilling are transportation, land acquisition, site construction, and leachate management. It is assumed that landfill gas flaring system is not installed in the absence of generation of LFG since incoming waste does not contain biodegradables, and most of the decomposition of rejects has already happened at the composting site.

**S4. Methodology for Life Cycle Assessment (LCA)**

This section provides detailed related to the calculation of the emissions inventory for the various scenarios and the specific steps of each scenario.

**S4.1. Emissions from transportation**

Trucks used for transporting waste are assumed to be diesel-run heavy duty vehicles (HDVs) with gross vehicle weight of more than 3.5 tonnes and which also complied with Bharat stage IV norms of emissions (equivalent to Euro IV norms). Average mileage of the truck is 3 km/litre of diesel burnt

(Malik et al., 2015). The method of testing emission standards is European Transient Cycle (ETC) test which estimates the emissions in terms of g/kWh. These emissions are then converted to g/km using equation (2) and later to g/km/tonne MSW, since the functional unit of the study is 1 tonne MSW.

$$E = \frac{E_0 \times \eta \times GCV \times \rho}{m} \quad (1)$$

where,  $E$  is emissions (g/km),  $E_0$  is emission (g/kWh),  $\eta$  is fuel efficiency (kWh available/kWh generated),  $GCV$  is gross calorific value of the fuel (kWh generated/kg fuel burnt),  $\rho$  is fuel density (kg/litre), and  $m$  is vehicle mileage (km/litre). Table S20 in reports the emission inventory (Baidya and Borken-Kleefeld, 2009; Malik et al., 2015). Fuel efficiency is taken to be 0.47 (Holmberg et al., 2014). GCV of diesel is 10800 kcal/kg (12.55 kWh/kg) (Kumar, 2010) and the density of diesel is 0.8325 kg/litre.

**Table S20. Emissions from transportation of waste in trucks**

| Gas component   | $E_0$ (g/kWh) | $E$ (g/km) | g/km/tonne MSW |
|-----------------|---------------|------------|----------------|
| CO              | 4.0           | 6.54       | 0.77           |
| HC              | 0.55          | 0.90       | 0.11           |
| NO <sub>x</sub> | 3.5           | 5.72       | 0.67           |
| PM              | 0.03          | 0.05       | 0.01           |
| CO <sub>2</sub> | -             | 706        | 83.06          |
| SO <sub>2</sub> | -             | 0.44       | 0.05           |

#### S4.2. Landfill Gas Generation

A number of models such as IPCC (1997, 2006), LandGEM (US EPA, 2005), and Shell Canyon model are available to predict the gas emissions from the decomposition of MSW in a landfill. After comparing these models for methane potential from landfill site, it has been concluded that the accuracy of LandGEM is better than other models (Sil et al., 2014a). Hence, LandGEM, abbreviated for Landfill Gas Emissions Model (Version 3.02), developed by the Environmental Protection Agency of the U.S. has been used in this study. LandGEM uses a first-order decomposition rate equation for quantifying methane emissions.

$$Q_{CH_4} = \sum_{i=1}^n \sum_{j=0.1}^1 \left[ \frac{M_i}{10} \right] e^{-kt_{ij}} \quad (2)$$

Where,  $Q_{CH_4}$  is annual methane generation in the year of calculation ( $m^3$ /year),  $i$  is 1 minus the year time increment,  $n$  is the difference between the year of the calculation and the initial year of waste acceptance,  $j$  is 0.1 minus the year time increment,  $k$  is the methane generation rate ( $year^{-1}$ ),  $L_0$  is the

potential methane generation capacity ( $\text{m}^3/\text{tonne}$ ),  $M_i$  is the mass of waste accepted in the  $i^{\text{th}}$  year (tonnes), and  $t_{ij}$  is the age of the  $j^{\text{th}}$  section of waste mass  $M_i$  accepted in the  $i^{\text{th}}$  year (decimal years, e.g., 3.2 years).

LandGEM is based on anaerobic decomposition of landfilled waste which has  $\text{CH}_4$  content between 40 and 60%. LandGEM allows users to input landfill characteristics and quantifies emissions of 46 air pollutants along with  $\text{CH}_4$ ,  $\text{CO}_2$  and NMOC. These pollutants are categorised either as hazardous air pollutant (HAP), volatile organic compound (VOC), both or none. Concentration of few pollutants such as benzene and toluene depends on type of disposal – either ‘co-disposal’ when hazardous wastes are also dumped along with MSW or ‘no or unknown co-disposal’ when hazardous wastes are separated from MSW (Alexander et al., 2005). ‘Co-disposal’ type of disposal is assumed for this study on account of poor segregation of wastes in India. The model quantifies emissions for 140 years from 2017 to 2156. However, emissions only till the end of post-closure care period are considered i.e. from 2017 to 2060, as these constitute 99.5% of the total emissions during 140 years. The  $\text{CO}_2$  emitted from dumpsite/landfill is assumed to be of biogenic origin.

The two key model parameters, methane generation rate ( $k$ ) and potential methane generation capacity ( $L_0$ ), are adjusted to Indian conditions by taking into account the composition of MSW in Mumbai and comparing with that in the US, which forms the basis of the default model parameters. The input parameters are applicable for anaerobic degradation conditions. The potential methane generation capacity ( $L_0$ ) is assumed to be  $72.4 \text{ m}^3/\text{tonne}$  in case of sanitary landfill (US EPA, 2007). Methane generation rate constant gives the fraction of waste which decomposes in a given year to produce methane and, hence, varies according to the type of waste. The values of rate constant for fast-decaying, medium-decaying and slow-decaying waste are 0.40, 0.08 and  $0.02 \text{ year}^{-1}$ , respectively. The overall rate constant for entire landfill has been calculated by adding the products of weight fractions of different wastes and their respective rate constants, as shown in Table S21 (Sil et al., 2014a). 50% of green waste is assumed to degrade at a fast rate while remaining 50% degraded at a moderate rate (US EPA, 2007). Overall methane generation rate constant is calculated to be  $0.17 \text{ year}^{-1}$  and is the same for open dumpsite as well as sanitary landfill. Default values of NMOC concentration (4000 ppmv as hexane) and methane content (50% by volume) are assumed (US EPA, 2007).

LandGEM has been adjusted to quantify emissions in open dumping scenario as well. In presence of aerobic conditions at an open dumpsite, potential methane generation capacity ( $L_0$ ) reduces and has been assumed to be  $57.9 \text{ m}^3/\text{tonne}$  by taking a correction factor of 0.8 (US EPA, 2007). It is assumed that the same amount of carbon present in MSW undergoes degradation to form  $\text{CH}_4$  and  $\text{CO}_2$  in aerobic conditions as that in anaerobic conditions. Thus,  $\text{CH}_4$  emissions decrease and  $\text{CO}_2$  emissions increase in an open dumpsite compared to a sanitary landfill. Tables S21-S24 report the emission inventory for dumpsite and landfill, as quantified by LandGEM. However, Sil et al. (2014b) recommends a correction factor of 0.13 for predicting  $\text{CH}_4$  emissions from open dumping sites in India, owing to poor level of segregation.

**Table S21: Overall methane generation rate constant for dumpsite/landfill for use in LandGEM**

| Component                 | Degradability category | Composition (%) | Rate constant (k, year <sup>-1</sup> ) | % * k |
|---------------------------|------------------------|-----------------|----------------------------------------|-------|
| Food                      | Fast                   | 35.7            | 0.40                                   | 0.143 |
| Green waste               | Fast                   | 3.15            | 0.40                                   | 0.013 |
| Green waste               | Medium                 | 3.15            | 0.08                                   | 0.003 |
| Paper                     | Medium                 | 11.8            | 0.08                                   | 0.009 |
| Rubber, leather, textiles | Slow                   | 10.0            | 0.02                                   | 0.002 |
| Plastics, metal, glass    | Inert                  | 6.2             | 0                                      | 0     |
| Other inorganic           | Inert                  | 30.0            | 0                                      | 0     |
| Total                     |                        | 100.0           |                                        | 0.17  |

**Table S22. Emission rates of CH<sub>4</sub> and CO<sub>2</sub> for sanitary landfill**

| Year | CH <sub>4</sub> generated |         | CH <sub>4</sub> recovered |                    | LFG recover ed     | CO <sub>2</sub> generated | LFG gener-ated |
|------|---------------------------|---------|---------------------------|--------------------|--------------------|---------------------------|----------------|
|      | m <sup>3</sup> /year      | tn/year | m <sup>3</sup> /year      | m <sup>3</sup> /hr | m <sup>3</sup> /hr | tn/year                   | tn/year        |
| 2017 | 17181934                  | 11463   | 10309160                  | 1177               | 2354               | 31452                     | 42914          |
| 2018 | 31771434                  | 21196   | 19062861                  | 2176               | 4352               | 58158                     | 79354          |
| 2019 | 44174300                  | 29471   | 26504580                  | 3026               | 6051               | 80861                     | 110332         |
| 2020 | 54732894                  | 36515   | 32839736                  | 3749               | 7498               | 100188                    | 136703         |
| 2021 | 63736056                  | 42521   | 38241634                  | 4365               | 8731               | 116669                    | 159190         |
| 2022 | 71427476                  | 47653   | 42856486                  | 4892               | 9785               | 130748                    | 178401         |
| 2023 | 78012746                  | 52046   | 46807648                  | 5343               | 10687              | 142802                    | 194848         |
| 2024 | 83665323                  | 55817   | 50199194                  | 5731               | 11461              | 153149                    | 208966         |
| 2025 | 88531546                  | 59064   | 53118927                  | 6064               | 12128              | 162057                    | 221121         |
| 2026 | 92734882                  | 61868   | 55640929                  | 6352               | 12703              | 169751                    | 231619         |
| 2027 | 96379496                  | 64299   | 57827698                  | 6601               | 13203              | 176423                    | 240722         |
| 2028 | 99553274                  | 66417   | 59731964                  | 6819               | 13637              | 182232                    | 248649         |
| 2029 | 102330363                 | 68270   | 61398218                  | 7009               | 14018              | 187316                    | 255585         |
| 2030 | 104773323                 | 69899   | 62863994                  | 7176               | 14353              | 191787                    | 261687         |
| 2031 | 106934935                 | 71341   | 64160961                  | 7324               | 14649              | 195744                    | 267086         |
| 2032 | 108859731                 | 72626   | 65315839                  | 7456               | 14912              | 199268                    | 271893         |
| 2033 | 110585287                 | 73777   | 66351172                  | 7574               | 15149              | 202426                    | 276203         |
| 2034 | 112143305                 | 74816   | 67285983                  | 7681               | 15362              | 205278                    | 280094         |
| 2035 | 113560535                 | 75762   | 68136321                  | 7778               | 15556              | 207872                    | 283634         |
| 2036 | 114859547                 | 76628   | 68915728                  | 7867               | 15734              | 210250                    | 286879         |
| 2037 | 96902958                  | 64649   | 58141775                  | 6637               | 13274              | 177381                    | 242029         |
| 2038 | 81753617                  | 54542   | 49052170                  | 5600               | 11199              | 149650                    | 204192         |
| 2039 | 68972650                  | 46015   | 41383590                  | 4724               | 9448               | 126254                    | 172269         |
| 2040 | 58189798                  | 38821   | 34913879                  | 3986               | 7971               | 106516                    | 145338         |
| 2041 | 49092685                  | 32752   | 29455611                  | 3363               | 6725               | 89864                     | 122616         |
| 2042 | 41417771                  | 27632   | 24850663                  | 2837               | 5674               | 75815                     | 103447         |
| 2043 | 34942716                  | 23312   | 20965630                  | 2393               | 4787               | 63963                     | 87275          |



|      |          |       |           |      |      |       |       |
|------|----------|-------|-----------|------|------|-------|-------|
| 2044 | 29479940 | 19667 | 17687964  | 2019 | 4038 | 53963 | 73630 |
| 2045 | 24871189 | 16593 | 14922713  | 1704 | 3407 | 45527 | 62119 |
| 2046 | 20982947 | 13999 | 12589768  | 1437 | 2874 | 38409 | 52408 |
| 2047 | 17702574 | 11810 | 10621544  | 1213 | 2425 | 32405 | 44215 |
| 2048 | 14935039 | 9964  | 8961023.3 | 1023 | 2046 | 27339 | 37302 |
| 2049 | 12600167 | 8406  | 7560100.1 | 863  | 1726 | 23065 | 31471 |
| 2050 | 10630317 | 7092  | 6378190.4 | 728  | 1456 | 19459 | 26551 |
| 2051 | 8968425  | 5983  | 5381054.9 | 614  | 1229 | 16417 | 22400 |
| 2052 | 7566344  | 5048  | 4539806.7 | 518  | 1036 | 13850 | 18898 |
| 2053 | 6383459  | 4259  | 3830075.2 | 437  | 874  | 11685 | 15944 |
| 2054 | 5385499  | 3593  | 3231299.6 | 369  | 738  | 9858  | 13451 |
| 2055 | 4543556  | 3031  | 2726133.8 | 311  | 622  | 8317  | 11348 |
| 2056 | 3833239  | 2557  | 2299943.2 | 263  | 525  | 7017  | 9574  |
| 2057 | 3233969  | 2158  | 1940381.2 | 222  | 443  | 5920  | 8077  |
| 2058 | 2728386  | 1820  | 1637031.3 | 187  | 374  | 4994  | 6815  |
| 2059 | 2301843  | 1536  | 1381105.7 | 158  | 315  | 4214  | 5749  |
| 2060 | 1941984  | 1296  | 1165190.3 | 133  | 266  | 3555  | 4850  |

**Table S23. Emission rates of CH<sub>4</sub> for open dumpsite**

| Year | CH <sub>4</sub><br>emitted<br>(tn/year) |
|------|-----------------------------------------|------|-----------------------------------------|------|-----------------------------------------|------|-----------------------------------------|
| 2017 | 9167                                    | 2028 | 53115                                   | 2039 | 36799                                   | 2050 | 5672                                    |
| 2018 | 16951                                   | 2029 | 54597                                   | 2040 | 31046                                   | 2051 | 4785                                    |
| 2019 | 23569                                   | 2030 | 55900                                   | 2041 | 26193                                   | 2052 | 4037                                    |
| 2020 | 29202                                   | 2031 | 57053                                   | 2042 | 22098                                   | 2053 | 3406                                    |
| 2021 | 34005                                   | 2032 | 58080                                   | 2043 | 18643                                   | 2054 | 2873                                    |
| 2022 | 38109                                   | 2033 | 59001                                   | 2044 | 15729                                   | 2055 | 2424                                    |
| 2023 | 41622                                   | 2034 | 59832                                   | 2045 | 13270                                   | 2056 | 2045                                    |
| 2024 | 44638                                   | 2035 | 60588                                   | 2046 | 11195                                   | 2057 | 1725                                    |
| 2025 | 47235                                   | 2036 | 61282                                   | 2047 | 9445                                    | 2058 | 1456                                    |
| 2026 | 49477                                   | 2037 | 51701                                   | 2048 | 7968                                    | 2059 | 1228                                    |
| 2027 | 51422                                   | 2038 | 43618                                   | 2049 | 6723                                    | 2060 | 1036                                    |

**Table S24. Emission inventory of CH<sub>4</sub> and CO<sub>2</sub> for dumpsite/landfill**

| Item                                                    | Value   | Unit         |
|---------------------------------------------------------|---------|--------------|
| <b>Landfill</b>                                         |         |              |
| CH <sub>4</sub> generated                               | 1537983 | tonnes       |
| CH <sub>4</sub> flared                                  | 913562  | tonnes       |
| Remaining CH <sub>4</sub> emitted                       | 624421  | tonnes       |
|                                                         | 19.7    | kg/tonne MSW |
| CO <sub>2</sub> generated                               | 4219866 | tonnes       |
| CO <sub>2</sub> produced from CH <sub>4</sub> oxidation | 2512296 | tonnes       |
| Total CO <sub>2</sub> emitted                           | 6732162 | tonnes       |
|                                                         | 212.5   | kg/tonne MSW |
| Total C released                                        | 2304360 | tonnes       |
| <b>Dumpsite</b>                                         |         |              |
| CH <sub>4</sub> emitted                                 | 1229962 | tonnes       |
|                                                         | 38.8    | kg/tonne MSW |
| C emitted as CH <sub>4</sub>                            | 922471  | tonnes       |
| Total C released                                        | 2304360 | tonnes       |
| C emitted as CO <sub>2</sub>                            | 1381889 | tonnes       |
| CO <sub>2</sub> emitted                                 | 5066925 | tonnes       |
|                                                         | 160.0   | kg/tonne MSW |

**Table S25. Emission inventory of NMVOC and 46 pollutants for landfill**

| <b>Gas/Air pollutant</b>                             | <b>kg/tonne MSW</b> |
|------------------------------------------------------|---------------------|
| NMVOC                                                | 2.09                |
| 1,1,1-Trichloroethane (methyl chloroform) – HAP      | 0.00039             |
| 1,1,2,2-Tetrachloroethane - HAP/VOC                  | 0.0011              |
| 1,1-Dichloroethane (ethylidene dichloride) - HAP/VOC | 0.0014              |
| 1,1-Dichloroethene (vinylidene chloride) - HAP/VOC   | 0.00012             |
| 1,2-Dichloroethane (ethylene dichloride) - HAP/VOC   | 0.00025             |
| 1,2-Dichloropropane (propylene dichloride) - HAP/VOC | 0.00012             |
| 2-Propanol (isopropyl alcohol) – VOC                 | 0.018               |
| Acetone                                              | 0.0025              |
| Acrylonitrile - HAP/VOC                              | 0.002               |
| Benzene - No or Unknown Co-disposal - HAP/VOC        | 0.0009              |
| Benzene - Co-disposal - HAP/VOC                      | 0.0052              |
| Bromodichloromethane – VOC                           | 0.0031              |
| Butane – VOC                                         | 0.0018              |
| Carbon disulfide - HAP/VOC                           | 0.00027             |
| Carbon monoxide                                      | 0.024               |
| Carbon tetrachloride - HAP/VOC                       | 0.000004            |
| Carbonyl sulfide - HAP/VOC                           | 0.00018             |
| Chlorobenzene - HAP/VOC                              | 0.00017             |
| Chlorodifluoromethane                                | 0.00068             |
| Chloroethane (ethyl chloride) - HAP/VOC              | 0.00051             |
| Chloroform - HAP/VOC                                 | 0.00002             |
| Chloromethane – VOC                                  | 0.00037             |
| Dichlorobenzene - (HAP for para isomer/VOC)          | 0.00019             |
| Dichlorodifluoromethane                              | 0.012               |
| Dichlorofluoromethane – VOC                          | 0.0016              |
| Dichloromethane (methylene chloride) – HAP           | 0.0072              |
| Dimethyl sulfide (methyl sulfide) – VOC              | 0.0029              |
| Ethane                                               | 0.16                |

|                                               |           |
|-----------------------------------------------|-----------|
| Ethanol – VOC                                 | 0.0075    |
| Ethyl mercaptan (ethanethiol) – VOC           | 0.00087   |
| Ethylbenzene - HAP/VOC                        | 0.003     |
| Ethylene dibromide - HAP/VOC                  | 0.000001  |
| Fluorotrichloromethane – VOC                  | 0.00063   |
| Hexane - HAP/VOC                              | 0.0034    |
| Hydrogen sulphide                             | 0.0074    |
| Mercury (total) – HAP                         | 0.0000004 |
| Methyl ethyl ketone - HAP/VOC                 | 0.0031    |
| Methyl isobutyl ketone - HAP/VOC              | 0.0011    |
| Methyl mercaptan – VOC                        | 0.00073   |
| Pentane – VOC                                 | 0.0014    |
| Perchloroethylene (tetrachloroethylene) – HAP | 0.0037    |
| Propane – VOC                                 | 0.0029    |
| t-1,2-Dichloroethene – VOC                    | 0.0016    |
| Toluene - No or Unknown Co-disposal - HAP/VOC | 0.022     |
| Toluene - Co-disposal - HAP/VOC               | 0.095     |
| Trichloroethylene (trichloroethene) - HAP/VOC | 0.0022    |
| Vinyl chloride - HAP/VOC                      | 0.0028    |
| Xylenes - HAP/VOC                             | 0.0077    |

### S4.3. Leachate generation

Volumetric flow rate and composition are the main characteristics of leachate. The amount of leachate produced can be estimated either empirically or using techniques that use site-specific data. Climatic conditions such as precipitation and water evaporation rate significantly impact the amount of leachate generated. A water balance method has been used for the purpose of this study (Worrell et al., 2017). The schematic for water balance at a landfill is depicted in Fig. S2. The mass balance equation for 1-dimensional analysis of water movement is:

$$C = P(1 - R) - S - E \quad (3)$$

where,  $C$  is the total percolation into the top soil layer (mm/year),  $P$  is the precipitation (mm/year),  $R$  is the runoff coefficient,  $S$  is the storage within the soil or waste (mm/year), and  $E$  is the evapotranspiration (mm/year).

Average precipitation in Mumbai is 2142 mm/year (Rana et al., 2012). The type of land for the landfill is assumed to be the same as that for parks and undeveloped land. Runoff coefficient for such land type is between 0.10 and 0.20, and a value of 0.15 is used in this study (Chawathe, 2013). Evapotranspiration rate at landfill site is considered to be the same as India's average rate of 39% of precipitation (Jain, 2012). The soil is assumed to be at field capacity when water balance is applied, giving  $S = 0$  (Worrell et al., 2017). Volumetric flow rate of leachate is calculated using the rate of percolation into top soil layer and landfill area. Each landfill phase is active for one year and closed for remaining years till the end of post-closure care period. For example, phase 1 is active in the first year of landfill operation (2016) and closed subsequently for 44 years (2017-2060), phase 2 is active in the second year (2017) and closed thereafter for 43 years (2018-2060) and so on. Different leachate generation rates during active and post-closure care period have been reported for different landfills and it is assumed that the rate during post-closure period is one-sixth of the rate during active period (Hjelmar et al., 2000; Worrell et al., 2017). Leachate generation calculations are reported in Tables S26-S27.

De et al. (2016) discussed the composition of leachate from an unmanaged landfill in Dhapa, Kolkata, giving concentrations of some important compounds during active and closed landfill periods. It was reported that the concentrations of some components in leachate highly exceeded discharge standards during both active and closed periods. The composition of MSW and untreated leachate produced in the cities of Mumbai and Kolkata are assumed to be the same owing to the metropolitan status of both cities. These concentrations, reported in Table S27, are used for calculating emission inventory in case of open dumpsite where leachate entered the groundwater. For the sanitary landfill scenario, it is assumed that the treated leachate would meet the regulatory standards for discharge into surface waters, as mentioned in Solid Waste Management Rules (2016), and reported in Table S27. These standards are used as emission inventory for components whose concentrations exceeded permissible limits.

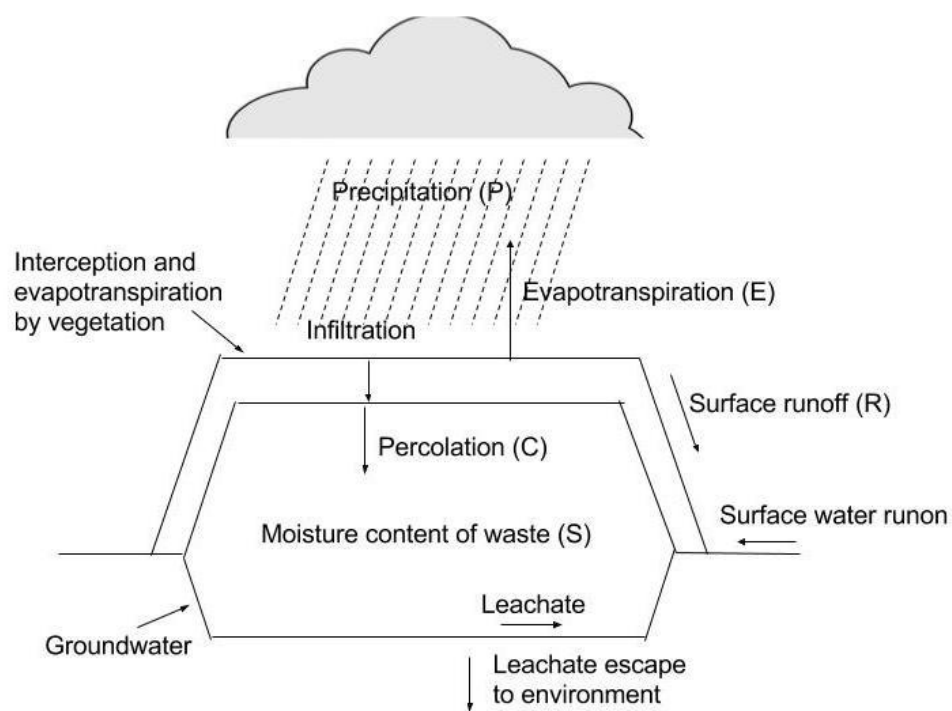

**Figure S2: Schematic for water balance at a landfill**

**Table S26. Phase-wise leachate generation quantities**

| Phase | Area (m <sup>2</sup> )     | Leachate generated            |                          |                               |
|-------|----------------------------|-------------------------------|--------------------------|-------------------------------|
|       |                            | Active (m <sup>3</sup> /year) | Closed (m <sup>3</sup> ) | Total/phase (m <sup>3</sup> ) |
| 1     | 99608                      | 98146                         | 719879                   | 818025                        |
| 2     | 100139                     | 98669                         | 707269                   | 805938                        |
| 3     | 100673                     | 99195                         | 694503                   | 793698                        |
| 4     | 101209                     | 99724                         | 681581                   | 781305                        |
| 5     | 101749                     | 100255                        | 668502                   | 768758                        |
| 6     | 102291                     | 100790                        | 655264                   | 756054                        |
| 7     | 102837                     | 101327                        | 641866                   | 743193                        |
| 8     | 103385                     | 101867                        | 628307                   | 730174                        |
| 9     | 103936                     | 102410                        | 614584                   | 716994                        |
| 10    | 104490                     | 102956                        | 600698                   | 703654                        |
| 11    | 105047                     | 103505                        | 586645                   | 690150                        |
| 12    | 105607                     | 104057                        | 572427                   | 676483                        |
| 13    | 106170                     | 104611                        | 558039                   | 662651                        |
| 14    | 106736                     | 105169                        | 543482                   | 648651                        |
| 15    | 107305                     | 105730                        | 528754                   | 634484                        |
| 16    | 107877                     | 106293                        | 513854                   | 620147                        |
| 17    | 108452                     | 106860                        | 498780                   | 605640                        |
| 18    | 109030                     | 107430                        | 483530                   | 590960                        |
| 19    | 109611                     | 108002                        | 468104                   | 576106                        |
| 20    | 110196                     | 108578                        | 452499                   | 561077                        |
| Total | 2096349                    | 2065574                       | 11818568                 | 13884142                      |
|       | <b>m<sup>3</sup>/tonne</b> | <b>0.07</b>                   | <b>0.37</b>              | <b>0.438</b>                  |



**Table S27. Average leachate generation rates**

| Item                                          | Value       | Unit                      |
|-----------------------------------------------|-------------|---------------------------|
| Avg. precipitation in Mumbai (P)              | 2142        | mm/year                   |
| Runoff coefficient (R)                        | 0.15        |                           |
| Evapotranspiration (E)                        | 39          | % of precipitation        |
| Storage within soil/waste (S)                 | 0           | mm/year                   |
| Percolation into top soil layer (C)           | 985         | mm/year                   |
| Total leachate generated (active)             | 2.1         | mn m <sup>3</sup>         |
| Avg. leachate generation rate (active)        | <b>0.07</b> | m <sup>3</sup> /tonne MSW |
| Total leachate generated (post-closure)       | 11.8        | mn m <sup>3</sup>         |
| Avg. leachate generation rate (post-closure)  | <b>0.37</b> | m <sup>3</sup> /tonne MSW |
| Total leachate generated (over 45 years)      | <b>13.9</b> | mn m <sup>3</sup>         |
| Avg. leachate generation rate (over 45 years) | <b>0.44</b> | m <sup>3</sup> /tonne MSW |
|                                               | 845         | m <sup>3</sup> /day       |

**Table S28. Leachate characteristics for dumpsite/landfill**

(\* denotes within permissible limit)

| Component                       | Disc. std. | Active dumpsite |                   | Closed dumpsite |                    | Total OD          | Total SL          |
|---------------------------------|------------|-----------------|-------------------|-----------------|--------------------|-------------------|-------------------|
|                                 |            | mg/L            | mg/tn             | mg/L            | mg/tn              | mg/tn             | mg/tn             |
| Total dissolved solids-TDS      | 2100       | 10014.17        | $6.5 \times 10^5$ | 5987.5          | $2.2 \times 10^6$  | $2.9 \times 10^6$ | $9.2 \times 10^5$ |
| Biochem. O2 demand-BOD5         | 30         | 2641.58         | $1.7 \times 10^5$ | 1343.2          | $5.0 \times 10^5$  | $6.7 \times 10^5$ | $1.3 \times 10^4$ |
| Chem. O2 Demand-COD             | 250        | 5653            | $3.7 \times 10^5$ | 2775            | $1.04 \times 10^6$ | $1.4 \times 10^6$ | $1.1 \times 10^5$ |
| Total Kjeldahl Nitrogen-TKN     | 100        | 5529.22         | $3.6 \times 10^5$ | 2846            | $1.06 \times 10^6$ | $1.4 \times 10^6$ | $4.4 \times 10^4$ |
| Total Fe                        | -          | 4.26            | $2.8 \times 10^2$ | 3.16            | $1.2 \times 10^3$  | $1.5 \times 10^3$ | -                 |
| Cu                              | 3          | 0.32*           | 20.9              | 0.27*           | $1 \times 10^2$    | $1.2 \times 10^2$ | $1.2 \times 10^2$ |
| Ni                              | 3          | 0.51*           | 33.3              | 0.43*           | $1.6 \times 10^2$  | $1.9 \times 10^2$ | $1.9 \times 10^2$ |
| Zn                              | 5          | 7.61            | $5.0 \times 10^2$ | 3.26*           | $1.2 \times 10^3$  | $1.7 \times 10^3$ | $1.5 \times 10^3$ |
| Pb                              | 0.1        | 0.6             | 39.1              | 0.69            | $2.6 \times 10^2$  | $3 \times 10^2$   | 44                |
| Total Cr                        | 2          | 3.22            | $2.1 \times 10^2$ | 1.19*           | $4.4 \times 10^2$  | $6.5 \times 10^2$ | $5.7 \times 10^2$ |
| Hg                              | 0.01       | 0.87            | 56.7              | 1.2             | $4.5 \times 10^2$  | $5.0 \times 10^2$ | 4                 |
| As                              | 0.2        | 0.03*           | 2.0               | 0.22            | 82.1               | 84                | 77                |
| CN <sup>-</sup>                 | 0.2        | 0.03*           | 1.96*             | 0.02            | 9.03               | 9                 | 9                 |
| Na <sup>+</sup>                 | -          | 2196.42         | $1.4 \times 10^5$ | 2105.6          | $7.9 \times 10^5$  | $9.3 \times 10^5$ | -                 |
| K <sup>+</sup>                  | -          | 1794.3          | $1.2 \times 10^5$ | 1297.6          | $4.8 \times 10^5$  | $6.0 \times 10^5$ | -                 |
| PO <sub>4</sub> <sup>3-</sup> P | -          | 18.88           | $1.2 \times 10^3$ | 9.09            | $3.4 \times 10^3$  | $4.6 \times 10^3$ | -                 |

#### S4.4. Emissions from composting facility

**Table S29. Leachate characteristics for CO\_SL**

(Leachate generation rate: 29.7 (active) and 169.9 (closed) L/tonne MSW collected)

| Component                     | mg/tonne MSW collected |
|-------------------------------|------------------------|
| Total dissolved solids – TDS  | 4.2x10 <sup>5</sup>    |
| Total Kjeldahl Nitrogen – TKN | 2.0x10 <sup>4</sup>    |
| Cu                            | 55                     |
| Ni                            | 88                     |
| Zn                            | 7.0x10 <sup>2</sup>    |
| Pb                            | 20                     |
| Total Cr                      | 2.62x10 <sup>2</sup>   |
| Hg                            | 2                      |
| As                            | 35                     |
| CN <sup>-</sup>               | 4                      |

Emissions resulting from generation and consumption of electricity at the composting site are included and the inventory is reported in Table S30 (Brander et al., 2011). Emissions due to combustion of diesel in the equipment at the site are also included and reported in Table S31 (US EPA, 2000). CO<sub>2</sub>, NH<sub>3</sub> and VOCs are the main gaseous compounds released during composting of wastes and these emissions of biogenic origin are quantified using Equations (5)-(7) (US EPA, 2000; Komilis and Ham, 2004). Very high standard errors have been reported for the coefficients in equation (7).

$$Y_{CO_2} = 220F_p + 240F_y + 370F_f \quad (4)$$

$$Y_{NH_3} = 1.3F_p + 5.2F_y + 38F_f - 69F_pF_f \quad (5)$$

$$Y_{VOC} = 4162F_p + 831F_y + 458F_f - 7558F_pF_y - 6006F_pF_f \quad (6)$$

Where,  $Y_{CO_2}$  is the yield of CO<sub>2</sub> (g C/kg of dry organic fraction in MSW),  $Y_{NH_3}$  is the yield of NH<sub>3</sub> (g N/kg of dry organic fraction in SW), and  $Y_{VOC}$  is the mass of 12 VOCs volatilised from MSW mixture (µg VOCs/kg of dry organic fraction in MSW).  $F_p$  is the fraction of dry paper waste in dry organic fraction of MSW,  $F_y$  is the fraction of dry green/yard waste in dry organic fraction of MSW, and  $F_f$  is the fraction of dry food waste in dry organic fraction of MSW. Moisture content in paper, green and food waste is 10.2%, 60% and 70%, respectively (US EPA, 2000). The values of  $F_p$ ,  $F_y$  and  $F_f$  are reported in Table 4. The reduction in weight of dry organic fraction leaving the composting pad is calculated using Equation (7) (Komilis and Ham, 2004).

$$DR = YCO_2/490 \quad (7)$$

Assuming the post-processing trommel screening efficiency to be 85% and moisture content in the compost to be 50%, the quantity of compost produced per tonne of MSW is calculated (US EPA, 2000). Results of mass balance at the composting site are reported in Table 5.

**Table S30. Emission inventory for generation and consumption of electricity**

| Pollutant                | kg/kWh electricity consumed |
|--------------------------|-----------------------------|
| CO <sub>2</sub> (fossil) | 1.8                         |
| CH <sub>4</sub>          | $2.1 \times 10^{-5}$        |
| N <sub>2</sub> O         | $2.7 \times 10^{-5}$        |

**Table S31. Emission inventory for diesel combustion in equipment (kg/kWh)**

|         | HC     | CO (fossil) | NO <sub>x</sub> | PM (total) | SO <sub>x</sub> | CO <sub>2</sub> (fossil) |
|---------|--------|-------------|-----------------|------------|-----------------|--------------------------|
| FEL     | 0.0009 | 0.0032      | 0.013           | 0.0009     | 0.0011          | 0.36                     |
| Grinder | 0.0017 | 0.0067      | 0.011           | 0.0011     | 0.0013          | 0.36                     |
| Turner  | 0.0030 | 0.0092      | 0.014           | -          | -               | 0.3                      |

**Table S32: Fraction of dry waste constituents in dry organic MSW**

| Component       | Waste composted (% of MSW collected) | Moisture content (%) | Dry weight (kg/ ton MSW collected) | Fraction of dry waste |
|-----------------|--------------------------------------|----------------------|------------------------------------|-----------------------|
| Food (□□)       | 35.7                                 | 70                   | 107.1                              | 0.49                  |
| Green/yard (□□) | 6.3                                  | 60                   | 25.2                               | 0.12                  |
| Paper (□□)      | 9.44                                 | 10.2                 | 84.8                               | 0.39                  |
| Total           | 51.44                                | 57.8                 | 217.1                              | 1.00                  |

**Table S33: Waste flows through the composting facility - mass balance**

| Stage                                               | Dry weight (kg/ton MSW collected) | Moisture (kg/ton MSW collected) | Total (kg/ton MSW collected) |
|-----------------------------------------------------|-----------------------------------|---------------------------------|------------------------------|
| Mass entering composting pad                        | 217.1                             | 297.3                           | 514.4                        |
| Mass exiting composting pad/<br>entering curing pad | 85.8                              | 85.8                            | 171.6                        |
| Mass exiting facility (compost)                     | 73                                | 73                              | 146                          |
| Rejects to landfill                                 | 12.9                              | 12.9                            | 25.8                         |

## S5. Results and discussion

### S5.1. Economic analysis

The component wise cost of landfilling is reported in Table S34. Site development cost comprised mainly of equipment costs, such as, fuel storage tanks, compactors, bulldozers, front end loaders and graders. Construction cost included the costs incurred in building structures, roads, buildings, scale house, weight system, fencing and monitoring systems. Annual facility operations and maintenance constituted operating cost of the equipment, site repairs, environmental monitoring (sampling and analysis) and final cap construction for each phase. Closure and post-closure costs included costs for environmental monitoring, drainage and erosion control system, maintenance of final cap and landscaping.

**Table S34. Total expenses for setting up the sanitary landfill**

| Component                           | Total cost (INR billion) |       |       | Per tonne cost (INR) |       |       | Contribution (%) |
|-------------------------------------|--------------------------|-------|-------|----------------------|-------|-------|------------------|
|                                     | Capex                    | Opex  | Total | Capex                | Opex  | Total |                  |
| Transportation                      | 1.94                     | 6.82  | 8.76  | 64                   | 227   | 291   | 21%              |
| Land acquisition                    | 1.88                     | -     | 1.88  | 59                   | -     | 59    | 4%               |
| Landfilling                         | 2.18                     | 5.09  | 7.27  | 69                   | 160   | 229   | 17%              |
| Leachate treatment                  | 5.65                     | 14.18 | 19.83 | 178                  | 448   | 626   | 46%              |
| LFG flaring                         | 1.26                     | 3.88  | 5.14  | 40                   | 122   | 162   | 12%              |
| Total                               | 12.91                    | 29.97 | 42.88 | 410                  | 957   | 1367  | 100%             |
| In US\$ terms (m indicates million) | 194 m                    | 450 m | 644 m | 6.16                 | 14.37 | 20.53 |                  |

**Table S35. Component-wise landfilling cost**

| Component                            | Total cost<br>(INR million) | Cost/tonne<br>(INR/tonne) | Contribution towards<br>final cost |
|--------------------------------------|-----------------------------|---------------------------|------------------------------------|
| Site development                     | 291                         | 9                         | 4%                                 |
| Construction                         | 1892                        | 60                        | 26%                                |
| Facility operations &<br>maintenance | 3900                        | 123                       | 54%                                |
| Facility closure                     | 10                          | 0.3                       | 0.1%                               |
| Facility post-closure                | 1181                        | 37                        | 16%                                |
| Total                                | 7274                        | 229                       | 100%                               |

**Table S36: Actual cost of composting and landfilling (per tonne of MSW, as collected)**

| Composting                                  |                                          |      |       | Landfilling                                     |                                       |      |       |
|---------------------------------------------|------------------------------------------|------|-------|-------------------------------------------------|---------------------------------------|------|-------|
| Component                                   | Cost (INR/tonne of<br>biodegradable MSW) |      |       | Component                                       | Cost (INR/tonne of<br>MSW landfilled) |      |       |
|                                             | Capex                                    | Opex | Total |                                                 | Capex                                 | Opex | Total |
| Transportation                              | 64                                       | 159  | 223   | Transportation                                  | 64                                    | 227  | 291   |
| Land acquisition and<br>site development    | 100                                      | -    | 100   | Land acquisition                                | 59                                    | -    | 59    |
| Equipment acquisition                       | 107                                      | -    | 107   | Landfilling                                     | 69                                    | 160  | 229   |
| Equipment maintenance                       | -                                        | 72   | 72    | Leachate treatment                              | 178                                   | 448  | 626   |
| Operations                                  | -                                        | 313  | 313   | Total                                           | 370                                   | 835  | 1205  |
| Total                                       | 271                                      | 544  | 815   | Actual cost (INR/<br>tonne of MSW<br>collected) | 169                                   | 380  | 549   |
| Actual cost (INR/tonne<br>of MSW collected) | 140                                      | 280  | 420   |                                                 |                                       |      |       |
| In US\$ terms                               | 2.1                                      | 4.2  | 6.3   | In US\$ terms                                   | 2.54                                  | 5.71 | 8.25  |

## S5.2. Emissions inventory

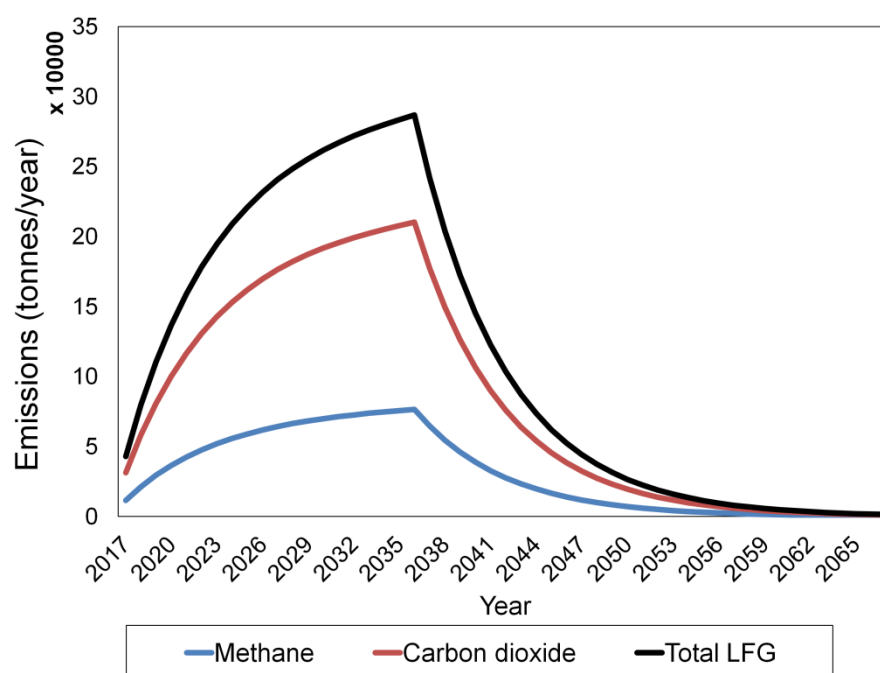

Figure S3: Annual emission estimates for sanitary landfill

**Table S37. Emission inventory for open burning of waste**

(PAH – polycyclic aromatic hydrocarbons, PCBs – polychlorinated biphenyls, PCDD/F – polychlorinated dibenzodioxins/dibenzofurans,

PCDD/F – polybrominated dibenzodioxins/dibenzofurans)

| <b>Pollutant</b>         | <b>kg/tonne MSW burned</b> | <b>kg/tonne MSW collected</b> |
|--------------------------|----------------------------|-------------------------------|
| CO <sub>2</sub> biogenic | 1453                       | 145.3                         |
| CO biogenic              | 38                         | 3.8                           |
| Methane                  | 3.7                        | 0.37                          |
| Acetylene                | 0.4                        | 0.04                          |
| Ethylene                 | 1.26                       | 0.126                         |
| Propylene                | 1.26                       | 0.126                         |
| Methanol                 | 0.94                       | 0.094                         |
| Formaldehyde             | 0.62                       | 0.062                         |
| Acetic acid              | 2.42                       | 0.242                         |
| Formic acid              | 0.18                       | 0.018                         |
| HCl                      | 3.61                       | 0.361                         |
| HCN                      | 0.47                       | 0.047                         |
| Benzene                  | 0.9                        | 0.09                          |
| Total PAH                | 0.3                        | 0.03                          |
| NMOC                     | 30.1                       | 3.01                          |
| NH <sub>3</sub>          | 1.12                       | 0.112                         |
| SO <sub>2</sub>          | 0.5                        | 0.05                          |
| NO <sub>x</sub> (NO)     | 3.74                       | 0.374                         |
| PM <sub>2.5</sub>        | 9.8                        | 0.98                          |
| PM <sub>10</sub>         | 11.9                       | 1.19                          |
| Hg                       | $2.10 \times 10^{-4}$      | $2.10 \times 10^{-5}$         |
| PCBs                     | $1.30 \times 10^{-4}$      | $1.30 \times 10^{-5}$         |
| PCDD/F                   | $3.70 \times 10^{-7}$      | $3.70 \times 10^{-8}$         |
| PBDD/F                   | $2.12 \times 10^{-7}$      | $2.12 \times 10^{-8}$         |
